# Supplementary material
Source: PubMed Central journal article supplement (PMC6818647)
Supplement: NIHMS1050682-supplement-Figure_S1_Legend.pdf [file NIHMS1050682-supplement-Figure_S1_Legend.pdf]

## Supplemental Materials

### Supplemental Figure Legends

Fig. S1. [Progression-free and overall survival](#) of patients with tumors <2 cm
